# Supplementary material
Source: PubMed Central journal article supplement (PMC3776006)

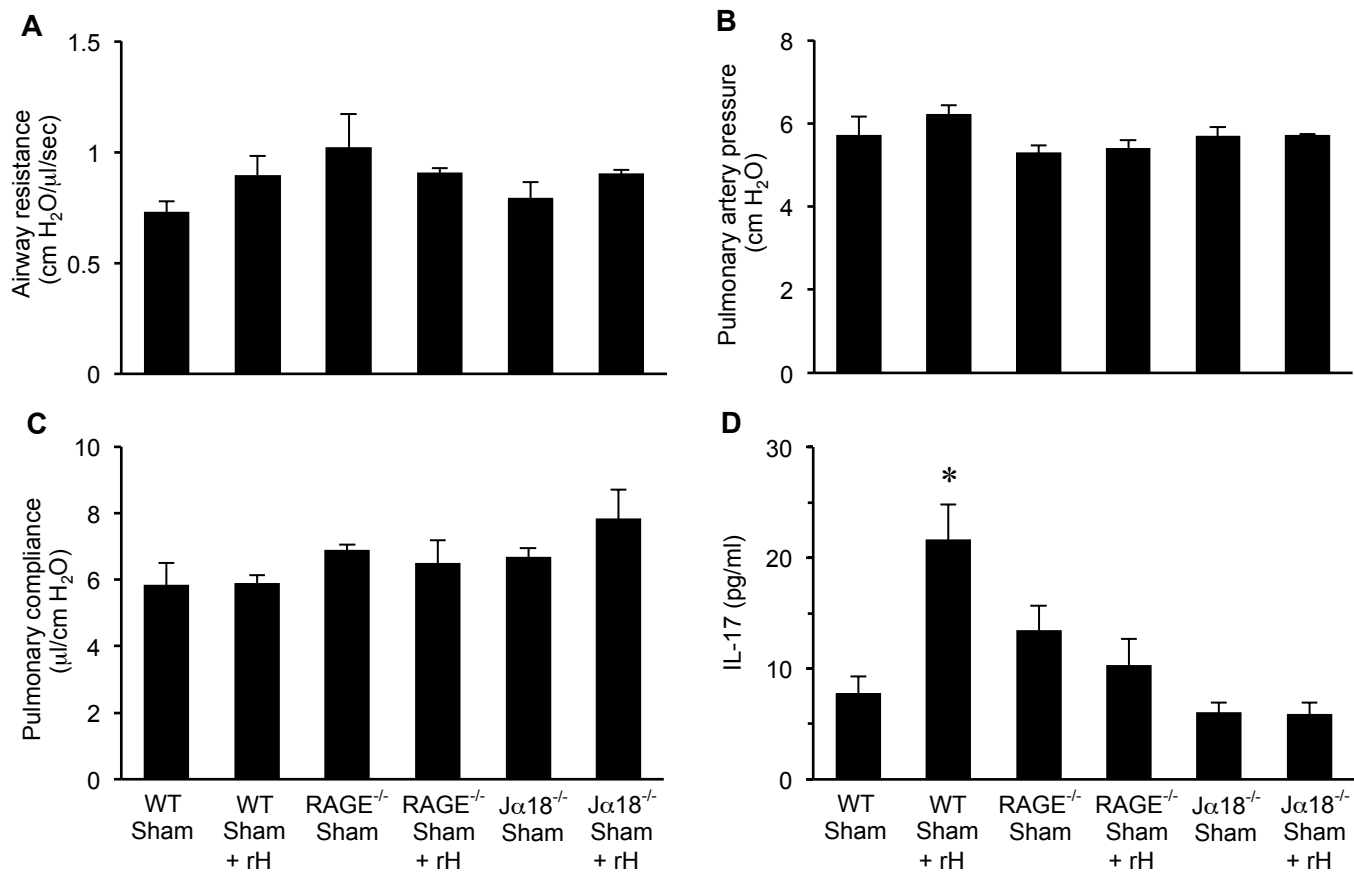

Supplement: NIHMS508095-supplement-Supp_Fig_S1.pdf [file NIHMS508095-supplement-Supp_Fig_S1.pdf]
